# Supplementary material
Source: PubMed Central journal article supplement (PMC2725243)
Supplement: mmc1.pdf [file mmc1.pdf]

## IDS Crossing of the Blood-Brain Barrier

### Corrects CNS Defects in MPSII Mice

Vinicia Assunta Polito and Maria Pia Cosma

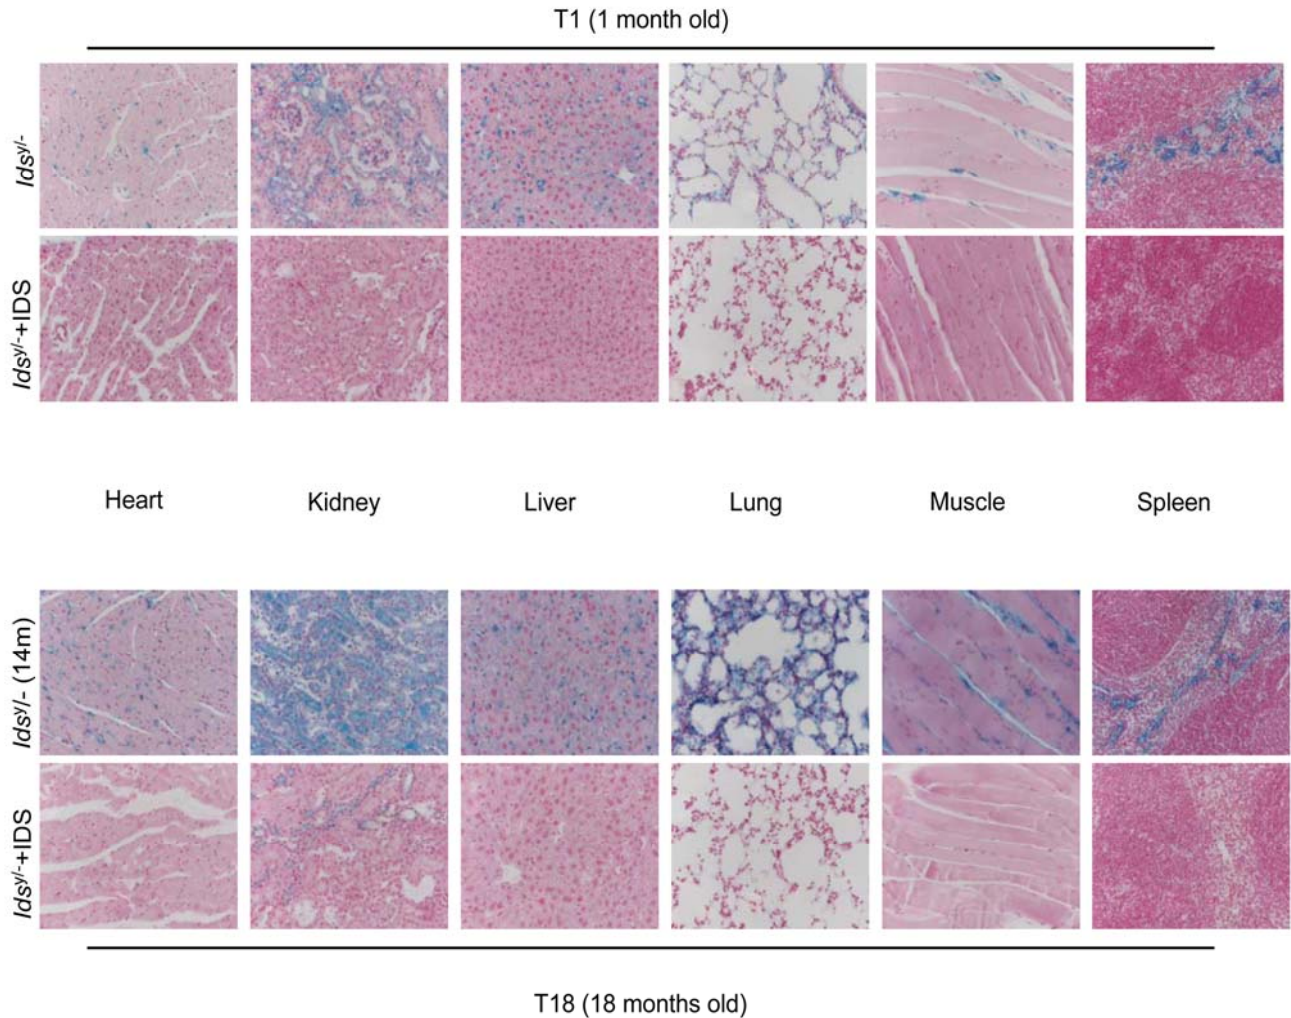

**Figure S1. Clearance of GAG Accumulation in all Tissues of *Ids*<sup>Y/-</sup>+IDS (T1) and *Ids*<sup>Y/-</sup>+IDS (T18) Injected Mice**

Qualitative GAG accumulation measured by Alcian Blue staining of sections of all tissues of *Ids*<sup>Y/-</sup> (T1-T14) and *Ids*<sup>Y/-</sup>+IDS (T1-T18) mice. Magnification, 20x.

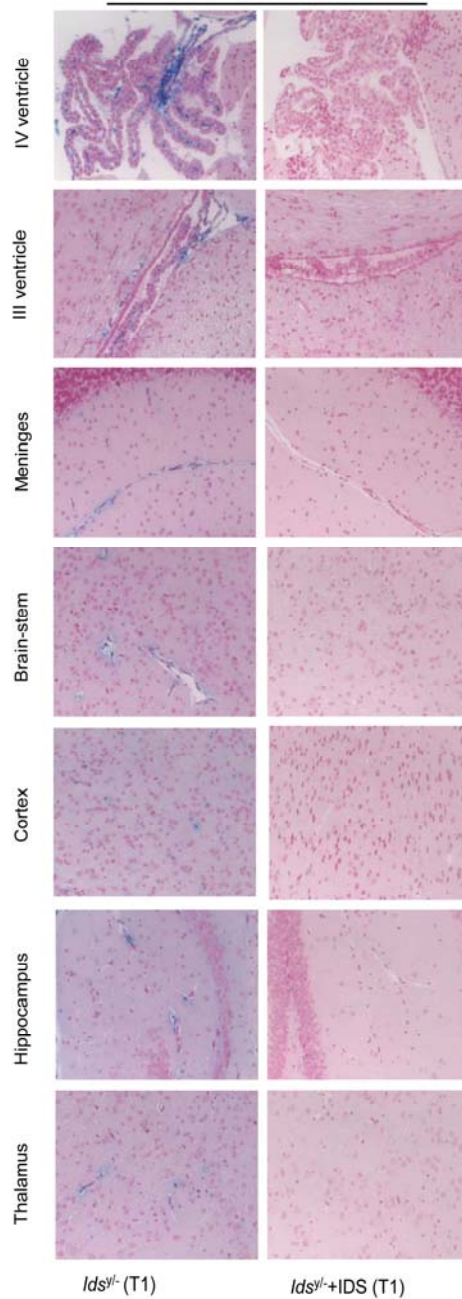

**Figure S2. Clearance of GAG Accumulation in *Ids<sup>y/-</sup>+IDS (T1)* Mice**

Alcian Blue stained sections of different regions of the brain of *Ids<sup>y/-</sup>* (T1) and *Ids<sup>y/-</sup>+IDS (T1)* mice. Magnification, 20x.

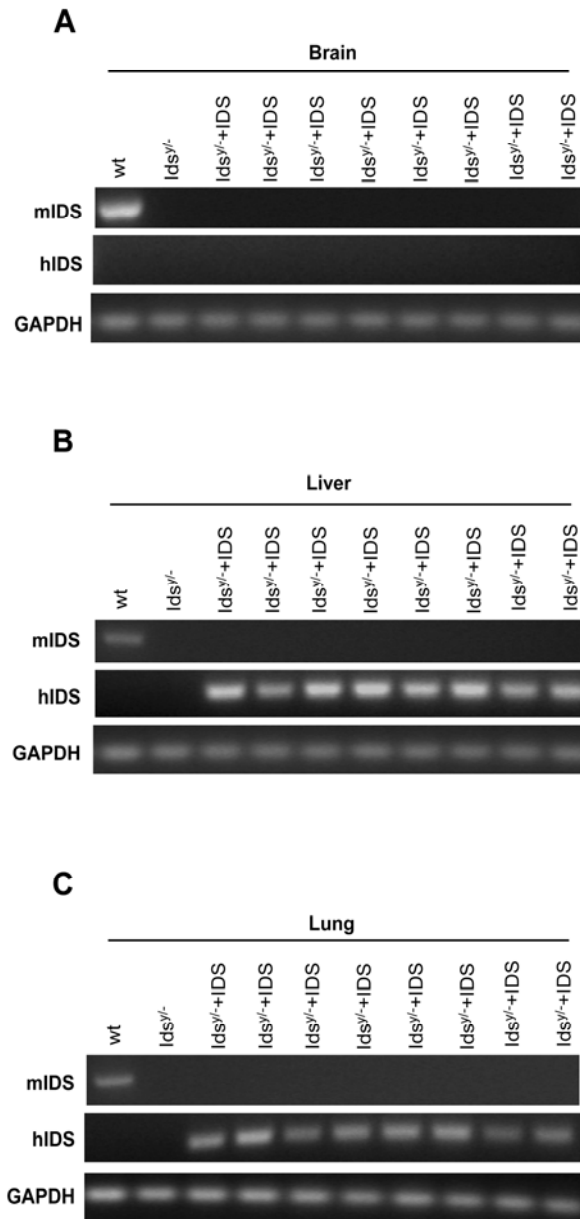

**Figure S3. IDS Protein Crossing of the BBB in *Ids<sup>y/-</sup>+IDS* (T1) Injected Mice**

**(A-C)** RT-PCR of hIDS and mIDS mRNAs from brains, livers and lungs of wt (T1), *Ids<sup>y/-</sup>* (T1), *Ids<sup>y/-</sup>+IDS* (T1) mice.

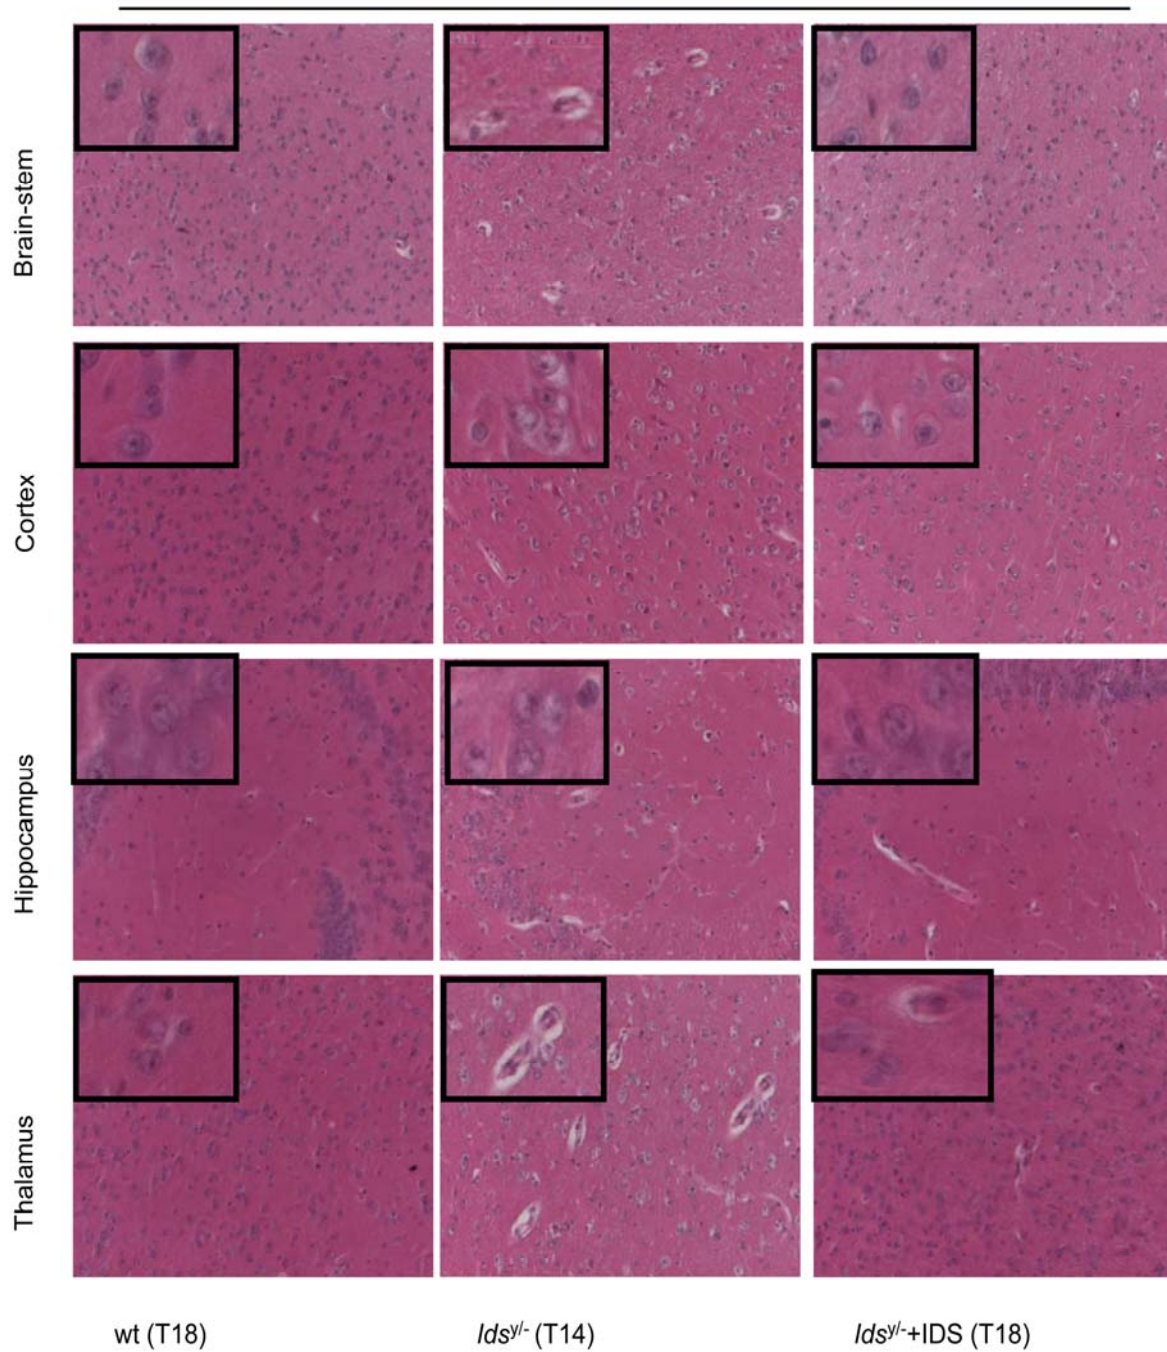

**Figure S4. Clearance of Vacuolization in Brain Sections of Treated Mice**

H&E stained sections of different regions of brains of wt (T18), *Ids<sup>yl/-</sup>* (T14) and *Ids<sup>yl/-</sup>*+IDS (T18) mice. Magnification, 20x (black box, 40x).

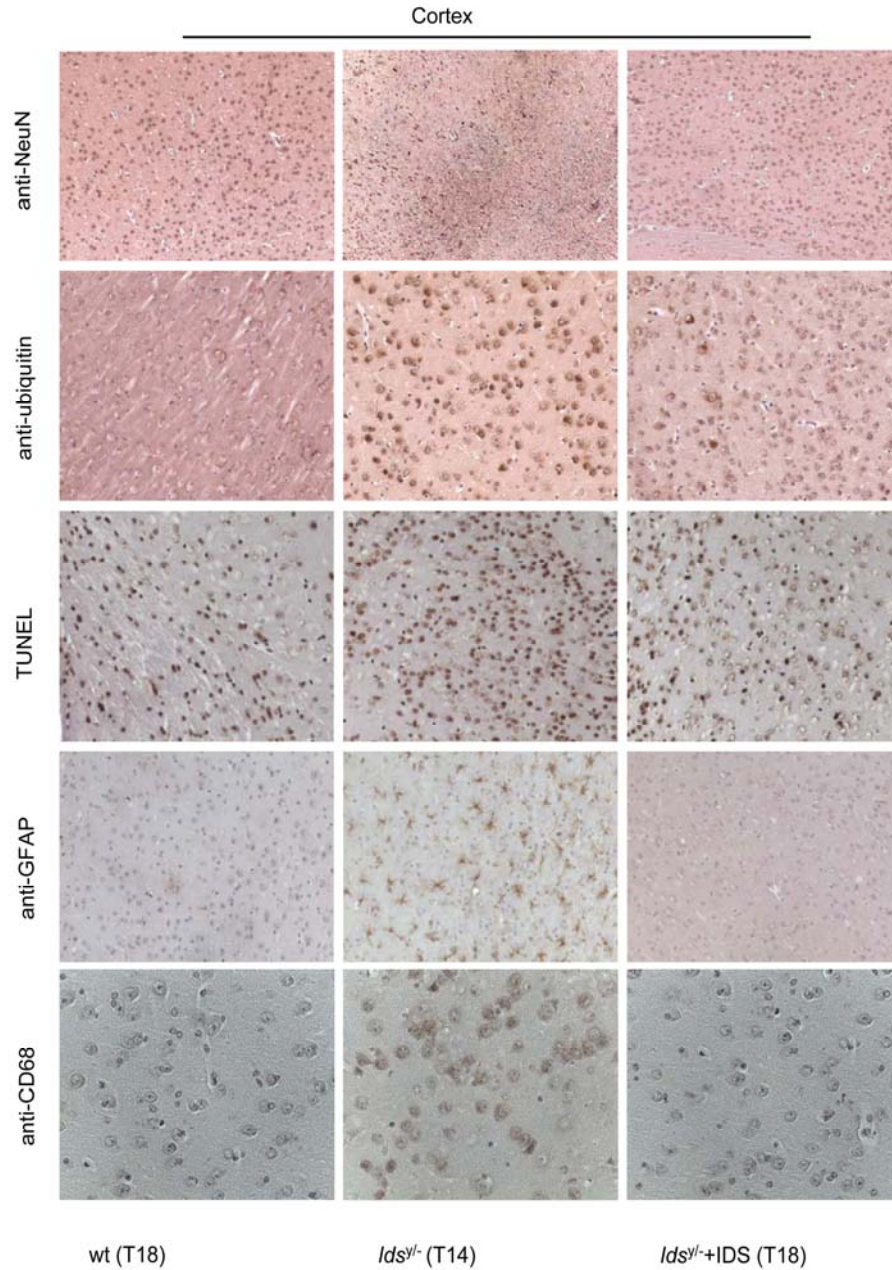

### Figure S5. Rescue of Brain Defects in *Ids<sup>Y/-</sup>* Treated Mice

Immunohistochemistry of different specific brain markers (anti-NeuN, anti-ubiquitin, TUNEL, anti-GFAP and anti-CD68) in cortex of wt (T18), *Ids<sup>Y/-</sup>* (T14), *Ids<sup>Y/-</sup>*+IDS (T18) brains. Magnification, 10x (anti-NeuN sections); 40x (anti-CD68 sections); 20x (all others).

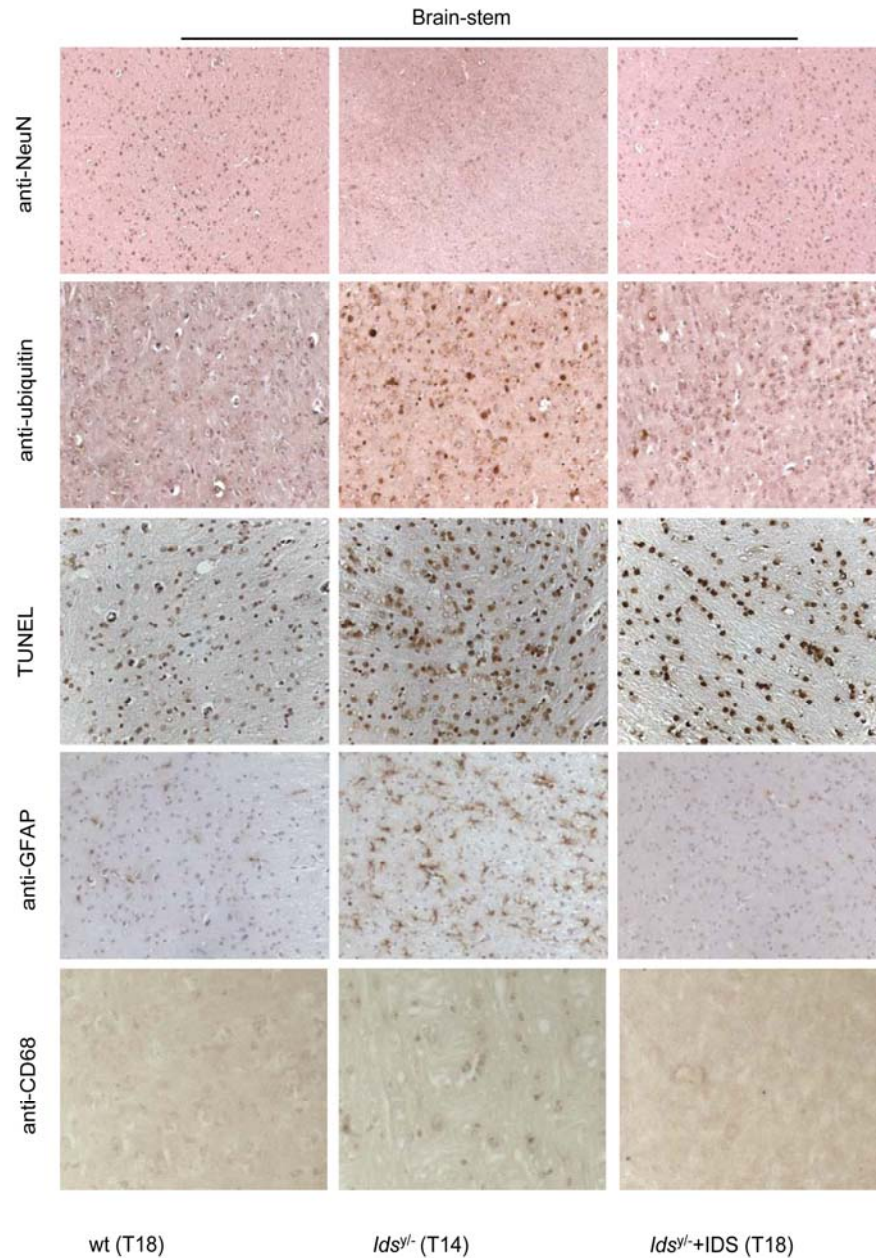

### Figure S6. Rescue of Brain Defects in *Ids*<sup>Y/-</sup> Treated Mice

Immunohistochemistry of different specific brain markers (anti-NeuN, anti-ubiquitin, TUNEL, anti-GFAP and anti-CD68) in brain stem of wt (T18), *Ids*<sup>Y/-</sup> (T14), *Ids*<sup>Y/-</sup>+IDS (T18) brains. Magnification, 10x (anti-NeuN sections); 40x (anti-CD68 sections); 20x (all others).

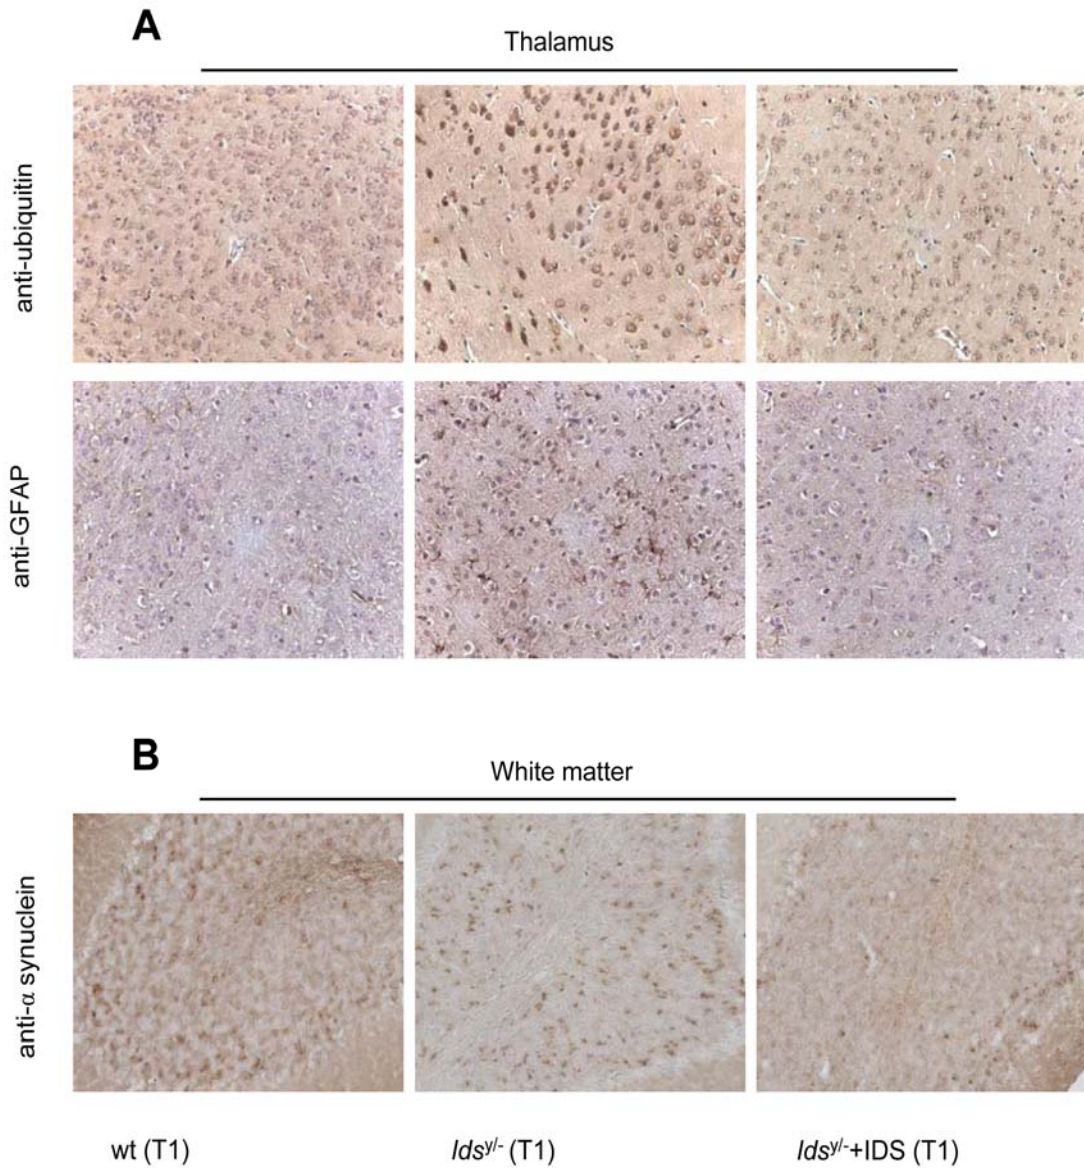

**Figure S7. Rescue of Brain Defects in *Ids<sup>Y/-</sup>* Treated T1 Mice**

**(A)** Immunohistochemistry of specific brain markers (anti-ubiquitin, anti-GFAP) in thalamus of wt (T1), *Ids<sup>Y/-</sup>* (T1) and *Ids<sup>Y/-</sup>*+IDS (T1) brain sections. **(B)** Immunohistochemistry of anti- $\alpha$ -synuclein in white matter of the same groups of mice. Magnification, 20x.

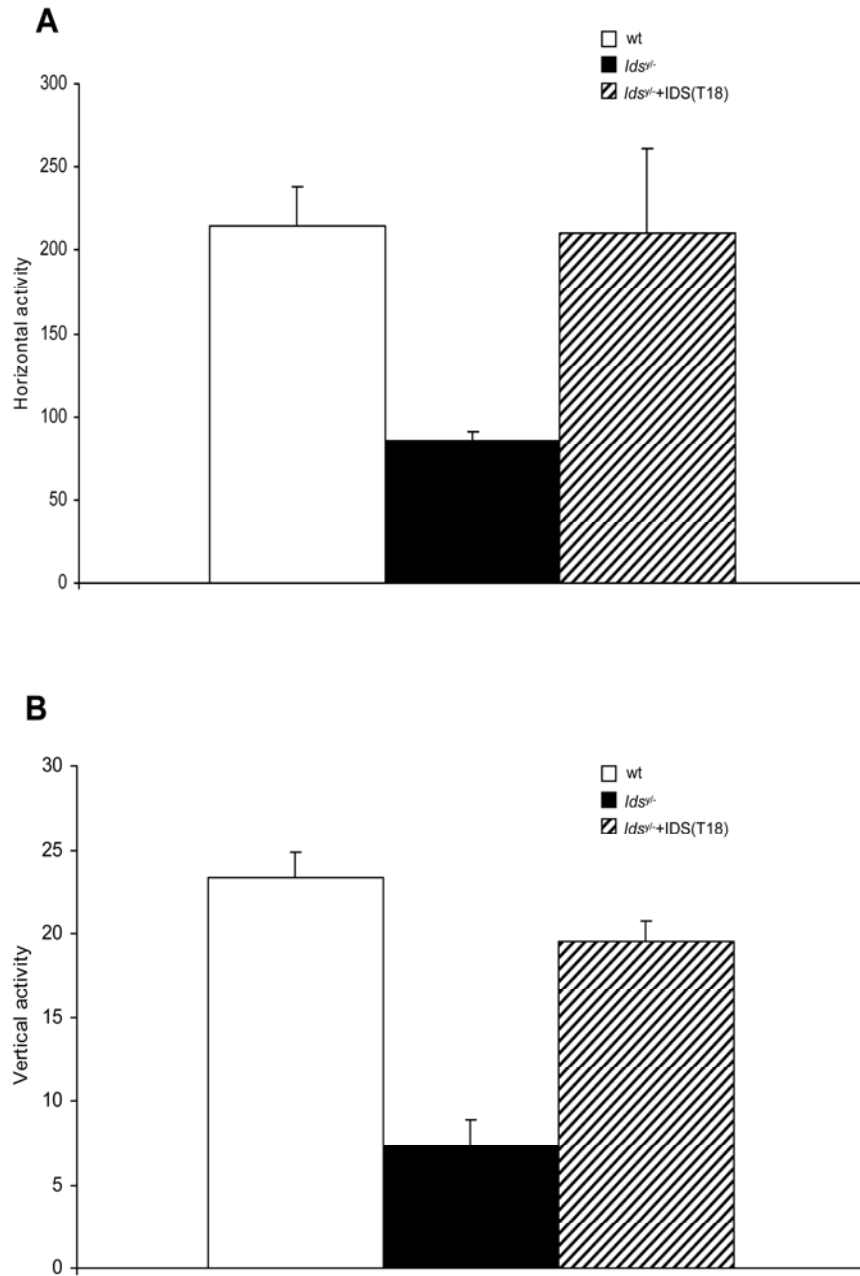

**Figure S8. *Ids<sup>Y/-</sup>* Treated Mice Underwent the Open-Field Test**

**(A, B)** Horizontal and vertical activities measured in *Ids<sup>Y/-</sup>*+IDS (T18,  $n = 4$ ) and control *Ids<sup>Y/-</sup>* (T14,  $n = 3$ ) mice. The error bars indicate standard deviations.  $P < 0.05$  (Student's  $t$ -test).



**Table S1. GAG Accumulation in the Urine**

| GAG Accumulation (mg GAG/mg creatinine) |           |           |           |           |
|-----------------------------------------|-----------|-----------|-----------|-----------|
|                                         | T1        | T6        | T12       | T18       |
| wt                                      | 16.0 ±0.6 | 17.0 ±1.0 | 19.0 ±1.0 | 19.0 ±1.1 |
| <i>lds</i> <sup>y/-</sup>               | 34.0 ±1.1 | 47.0 ±2.0 | 51.0 ±1.2 |           |
| <i>lds</i> <sup>y/-</sup> +IDS          | 22.0      |           |           |           |
| <i>lds</i> <sup>y/-</sup> +IDS          | 21.5      |           |           |           |
| <i>lds</i> <sup>y/-</sup> +IDS          | 22.3      |           |           |           |
| <i>lds</i> <sup>y/-</sup> +IDS          | 24.0      |           |           |           |
| <i>lds</i> <sup>y/-</sup> +IDS          | 23.0      |           |           |           |
| <i>lds</i> <sup>y/-</sup> +IDS          | 24.4      |           |           |           |
| <i>lds</i> <sup>y/-</sup> +IDS          | 21.0      |           |           |           |
| <i>lds</i> <sup>y/-</sup> +IDS          | 22.8      |           |           |           |
| <i>lds</i> <sup>y/-</sup> +IDS          | 21.0      | 22.5      | 22.0      | 25.0      |
| <i>lds</i> <sup>y/-</sup> +IDS          | 22.0      | 24.0      | 27.0      | 28.0      |
| <i>lds</i> <sup>y/-</sup> +IDS          | 24.0      | 25.1      | 23.0      | 29.0      |
| <i>lds</i> <sup>y/-</sup> +IDS          | 23.2      | 24.5      | 24.0      | 26.0      |

GAG accumulation in the urine measured at different times after therapy (T1-T6-T12-T18) (1-6-12-18 months after the injection, respectively) of wt ( $n = 3$ ), *lds*<sup>y/-</sup> ( $n = 3$ ) and *lds*<sup>y/-</sup> AAV2/5CMV-hIDS-injected mice.  $P < 0.05$  (Student's *t*-test). GAG concentrations were normalized against urine creatinine contents.
